# Supplementary material for: Q-FISH Measurement of Hepatocyte Telomere Lengths in Donor Liver and Graft after Pediatric Living-Donor Liver Transplantation: Donor Age Affects Telomere Length Sustainability
Source: PLoS One. 2014 Apr 11;9(4):e93749. doi: 10.1371/journal.pone.0093749 (PMC3984102; doi:10.1371/journal.pone.0093749)
Supplement: Table S3 — Acute cellular rejection episodes and Immunosuppression status. ACR: Acute Cellular Rejection. (XLS) [file pone.0093749.s003.xls]

## Sheet: Immunosuppressant
Table S3. Acute cellular rejection episodes and Immunosuppression status
group	Pair No.		ACR	Major complication of recipient	Pathological findings	Immunosuppression status at the biopsy	Immunosuppression status at 5 year after the biopsy
Lower NTCR group	1	Donor			(-)
		Recipient	0	Chronic hepatitis de novo HBV	Mild interface hepatitis	Carcineurin inhibitor: twice a day Micophenolate mofetil	Carcineurin inhibitor: once a day Micophenolate mofetil
	2	Donor			(-)
		Recipient	4	Unstable liver function	Mild interface hepatitis	Carcineurin inhibitor: twice a day Micophenolate mofetil Steroid	Carcineurin inhibitor: twice a day Micophenolate mofetil
	3	Donor			(-)
		Recipient	1	HV stenosis	Marked bridging fibrosis	Carcineurin inhibitor: twice a day Micophenolate mofetil Steroid	Carcineurin inhibitor: twice a day Micophenolate mofetil Steroid
	4	Donor			(-)
		Recipient	0	Unstable liver function	Mild lobular hepatitis	Carcineurin inhibitor: twice a day Micophenolate mofetil	Carcineurin inhibitor: twice a day Micophenolate mofetil
Comparable NTCR group	5	Donor			Moderate steatosis
		Recipient	1	de novo HBV (Seroconversion)	(-)	Carcineurin inhibitor: twice a day Micophenolate mofetil	Carcineurin inhibitor: once a day Micophenolate mofetil
	6	Donor			(-)
		Recipient	2	Liver dysfunction HV stenosis	marked bridging fibrosis	Carcineurin inhibitor: twice a day Micophenolate mofetil Steroid	Carcineurin inhibitor: twice a day Micophenolate mofetil Steroid
	7	Donor			(-)
		Recipient	0	None	Mild interface hepatitis	Carcineurin inhibitor: twice a day	Carcineurin inhibitor: twice a day
	8	Donor			Moderate steatosis (NASH suspected)
		Recipient	1	Biliary stricture	Canalicular cholestasis	Carcineurin inhibitor: twice a day	Carcineurin inhibitor: twice a day Micophenolate mofetil Steroid
	9	Donor			(-)
		Recipient	0	HV stenosis	Mild interface hepatitis	Carcineurin inhibitor: twice a day Micophenolate mofetil	Carcineurin inhibitor: twice a day Micophenolate mofetil Steroid
	10	Donor			(-)
		Recipient	0	None	(-)	Complete cessation	Complete cessation
	11	Donor			(-)
		Recipient	0	None	(-)	Carcineurin inhibitor: once a week	Complete cessation
	12	Donor			Moderate steatosis
		Recipient	1	Unstable liver function	(-)	Tacrolimus: twice a day Micophenolate mofetil	Tacrolimus: twice a day Micophenolate mofetil
ACR: Acute Cellular Rejection
